# Supplementary material for: Au nanoparticle decorated WO3 photoelectrode for enhanced photoelectrochemical properties
Source: Royal Society of Chemistry journal article supplement (doi:10.1039/c5ra06241a), 2015-01-01
Supplement: c5ra06241a1.pdf [file c5ra06241a1.pdf]

## Electronic Supplementary Information

### Au nanoparticles decorated WO<sub>3</sub> photoelectrode for enhanced photoelectrochemical properties

Fang Xu\*, Yanwen Yao, DanDan Bai, Rui Shu Xu, JingJing Mei, Dapeng Wu, Zhiyong Gao, Kai Jiang\*

Collaborative Innovation Center of Henan Province for Green Manufacturing of Fine Chemicals, Key Laboratory of Green Chemical Media and Reactions, Ministry of Education, School of Chemistry and Chemical Engineering, Henan Normal University, Xinxiang, Henan 453007, P. R. China

#### Experimental details

##### 1. Synthesis of WO<sub>3</sub> nanoparticles

All of the reagents were of analytical grade and were used without further purification. WO<sub>3</sub> nanoparticles were prepared via hydrothermal method reported recently with some modification<sup>26</sup>. The typical experimental procedure was as follows: 0.125 g of H<sub>2</sub>WO<sub>4</sub> and 0.5 mL H<sub>2</sub>O<sub>2</sub> (30 wt%) were dissolved into 2 mL of distilled water and then stirred intensely at 100 °C for 30 min. After being cooled, 0.35 mL of HCl (37 wt%), 0.0315 g oxalic acid dehydrate, 7.5 mL ethanol and 7.5 mL distilled water were added to the above solution. The obtained solution was transferred to 25 mL Teflon-lined autoclave at a constant temperature of 180 °C for 4 h. The precipitate was collected and washed repeatedly with distilled water, and was then dried at 60 °C under vacuum followed by calcinations in air at 550 °C for 2 h.

##### 2. Fabrication of WO<sub>3</sub>/FTO photoelectrode

F: SnO<sub>2</sub> coated conductive glass flakes (FTO, 1.5\*2.5 cm<sup>2</sup>) were cleaned by distilled water, ethanol and acetone. Firstly, a paste was prepared by adding hydroxypropyl cellulose (Aldrich) into diethylene glycol with a concentration of 10 wt% and heated at 100 °C for 5 h. Then, WO<sub>3</sub> nanoparticles were dispersed into the paste with the quality ratio of 1:3, and absolute ethanol was added and grounded in an agate mortar to form viscous slurry. Finally, the slurry was dropped onto a piece of FTO glass by doctor blading method, and the film was heated up to 550 °C at a rate of 5 °C min<sup>-1</sup> and maintained for 30 min after drying naturally.

##### 3. Preparation of Au decorated WO<sub>3</sub> photoelectrode

The Au nanoparticles sol was prepared by reducing  $\text{HAuCl}_4$  using  $\text{NaBH}_4$  as reductant in the presence of polyvinyl pyrrolidone (PVP). Briefly, 0.01 g PVP was added into 10 ml of 1 mM  $\text{HAuCl}_4$  aqueous solution and was heated at  $100^\circ\text{C}$  in a round bottom flask for 30 min. Then, 1 ml of 0.04 M  $\text{NaBH}_4$  aqueous solution was added and kept reaction for 30 min, and finally Au nanoparticles sol was obtained.

For preparation of Au nanoparticles decorated  $\text{WO}_3$  photoelectrode, 20  $\mu\text{L}$  of the Au sol was dropped onto  $\text{WO}_3$  film, and was then calcined at  $300^\circ\text{C}$  at a rate of  $3^\circ\text{C min}^{-1}$  for 2 h. One drop-coating process was defined as one cycle. For comparison, a series of Au decorated  $\text{WO}_3$  film with 1, 5, 10, 15, 20 cycles were prepared, and the samples were denoted as  $\text{WO}_3\text{-1Au}$ ,  $\text{WO}_3\text{-5Au}$ ,  $\text{WO}_3\text{-10Au}$ ,  $\text{WO}_3\text{-15Au}$ ,  $\text{WO}_3\text{-20Au}$  respectively.

#### 4. Characterization

The phase structure of the products were characterized by X-ray diffraction (XRD) using a Bruker advance-D8 with  $\text{Cu K}\alpha$  radiation. The field emission scanning electron microscopy (FESEM) images were obtained on Carl Zeiss AG SUPR40. The transmission electron microscope (TEM) images were obtained on JEOL JSM-100, and the high-resolution transmission electron microscope (HRTEM) images were observed on FEI Tecnai G220. The UV-Vis optical absorption of the samples was carried out on a Perkin-Elmer Lambda 950 UV-Vis spectrometer.

#### 5 Electrical and photoelectrochemical measurements

The photoelectrochemical measurements were carried out on a CHI 660D electrochemical workstation (shanghai chenhua, China) with a standard three-electrode electrochemical cell with a flat quartz window with Au decorated  $\text{WO}_3$  photoelectrode,  $\text{Ag/AgCl}$  and Pt foil using as working electrodes, reference electrode and counter electrode. All the electrodes were performed in a 0.5 M  $\text{Na}_2\text{SO}_4$  (pH=7) solution. The 500 W Xe lamp was used as irradiation source with a light intensity of  $100\text{ mW/cm}^2$ . By recording the wavelength-dependent photocurrent densities ( $J$ ) generated at specific wavelengths ( $\lambda$ ) and the monochromatic light intensities ( $J_{\text{light}}$ ) of the light source, the incident photon to electron conversion efficiency (IPCE) can be calculated using the following equation:

$$\text{IPCE} = 1240I(\text{mA} / \text{cm}^2) / [\lambda(\text{nm})J_{\text{light}}(\text{mW} / \text{cm}^2)]$$

Capacitance measurements were carried out at the AC frequency of 1 kHz in the dark.

Electrochemical impedance spectroscopy (EIS) was applied to explore the conductivity of the resulting electrodes under illumination.

## References

- 1 H. He, S. P. Berglund, P. Xiao, W. D. Chemelewski, Y. Zhang and C. B. Mullins, *Journal of Materials Chemistry A*, 2013, **1**, 12826-12834.

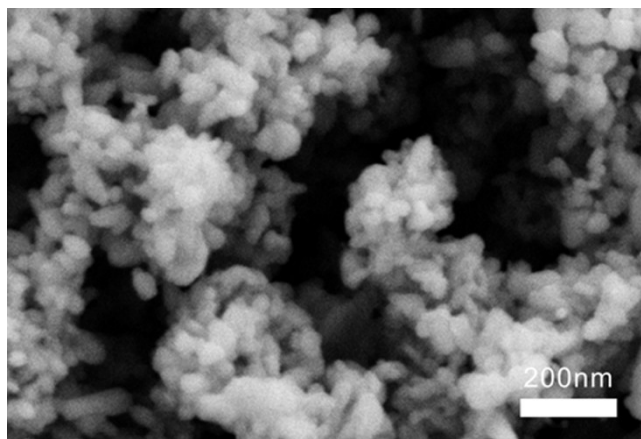

**Fig. S1.** SEM image of  $\text{WO}_3$  nanoparticle.

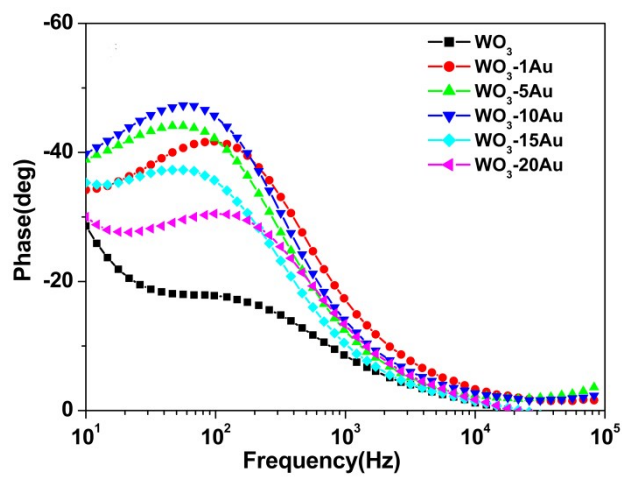

**Fig. S2.** Bode phase diagram for  $\text{WO}_3$  and  $\text{WO}_3$ -Au electrode.

**Tab. S1.** Elemental ration of WO<sub>3</sub>-10Au

| element | Quality percent | Atomic percent |
|---------|-----------------|----------------|
| O K     | 23.95           | 78.37          |
| W M     | 74.85           | 21.31          |
| Au M    | 1.20            | 0.32           |
| total   | 100.00          |                |

**Tab. S2.** The exact contents (wt %) of Au in the Au decorated WO<sub>3</sub> with different cycles

| Sample         | WO <sub>3</sub> -1Au | WO <sub>3</sub> -5Au | WO <sub>3</sub> -10Au | WO <sub>3</sub> -15Au | WO <sub>3</sub> -20Au |
|----------------|----------------------|----------------------|-----------------------|-----------------------|-----------------------|
| Contents (wt%) | 0.47                 | 0.65                 | 1.20                  | 1.40                  | 2.01                  |
